# Supplementary material for: Reducing dengue fever cases at the lowest budget: a constrained optimization approach applied to Thailand
Source: Springer Nature journal article supplement (doi:10.1186/s12889-021-10747-3), 2021-04-27
Supplement: MOESM1 [file 19110706]

Table S1. Dengue cases (DALYs lost) by levels of *Wolbachia* and vaccination coverage<sup>a</sup>

|                        |      | Vaccination coverage (%) |                       |                       |                       |                       |
|------------------------|------|--------------------------|-----------------------|-----------------------|-----------------------|-----------------------|
|                        |      | 20%                      | 40%                   | 60%                   | 80%                   | 100%                  |
| Wolbachia coverage (%) | 20%  | 1,417,931<br>(13,405)    | 1,337,095<br>(12,641) | 1,267,332<br>(11,981) | 1,200,286<br>(11,347) | 1,139,607<br>(10,774) |
|                        | 40%  | 1,303,028<br>(12,319)    | 1,239,815<br>(11,721) | 1,184,649<br>(11,199) | 1,130,722<br>(10,690) | 1,080,824<br>(10,218) |
|                        | 60%  | 1,252,812<br>(11,844)    | 1,196,744<br>(11,314) | 1,147,228<br>(10,846) | 1,098,567<br>(10,386) | 1,053,175<br>(9,957)  |
|                        | 80%  | 1,220,827<br>(11,541)    | 1,169,162<br>(11,053) | 1,122,875<br>(10,615) | 1,077,378<br>(10,185) | 1,035,018<br>(9,785)  |
|                        | 100% | 1,199,360<br>(11,339)    | 1,149,906<br>(11,339) | 1,105,994<br>(10,456) | 1,062,461<br>(10,044) | 1,021,832<br>(9,660)  |

<sup>a</sup> Total costs from the payer perspective (comprised of direct medical costs and intervention costs) represented by colour coded categories as follows:

≤ \$251 M
  \$252 M ≤ B ≤ \$368 M
  \$369 M ≤ B ≤ \$589 M
  ≥ \$590 M

DALYs, disability-adjusted life years.
